# Supplementary material for: Decomposing socioeconomic inequality in lean diabetes among middle-aged adults and elderly in India
Source: Research Square preprint supplement (doi:10.21203/rs.3.rs-5435500/v1), 2025-02-20
Supplement: Supplementary file 1 [file ad7b6785e2e8b859920a71fd.docx]

**Decomposing socioeconomic inequality in lean diabetes among middle-aged adults and elderly in India**

**Supplementary Material**

**Table of contents**

Figures S1 Adjusted Odds Ratios of MPCE quintiles, Education, and Social Caste for Diabetes and Lean Diabetes …………………………………………………………………………………………………….1

Figures S2. Decomposition of Erreygers’ concentration index of lean diabetes among middle-aged adults and elderly in India (2017-18) ……………………………………………………………………….….….2

Table S1 Sample Characteristics (Weighted %) …………………………………………………………….3

Table S2 Bivariate distribution of BMI across sociodemographic characteristics………………………….4

Table S3 Unadjusted Lean diabetes prevalence across background characteristics for overall and diabetic sample……………………………………………………………………………………………………….6

Table S4. Multivariate Logistic regression estimates of diabetes and lean diabetes in India…………….…7

Table S5. Erreygers’ Concentration Index for Lean diabetes prevalence by Sociodemographic characteristics ………………………………………………………………………………………………………………9

**Figures S1. Adjusted Odds Ratios of a) MPCE quintiles, b) Education, and c) Caste for Diabetes and Lean Diabetes.**


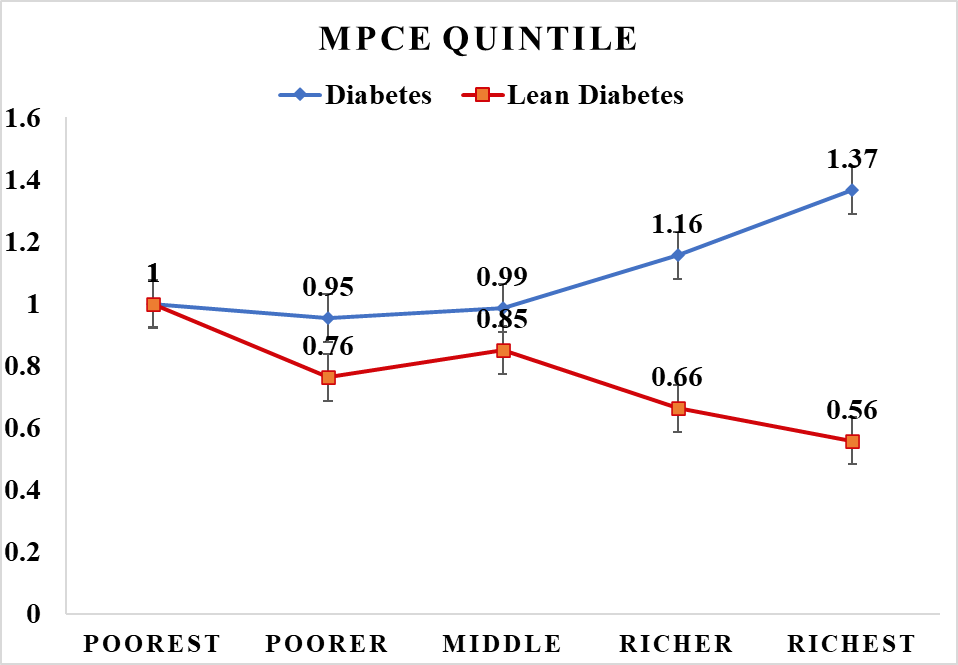


**Figure (a)**


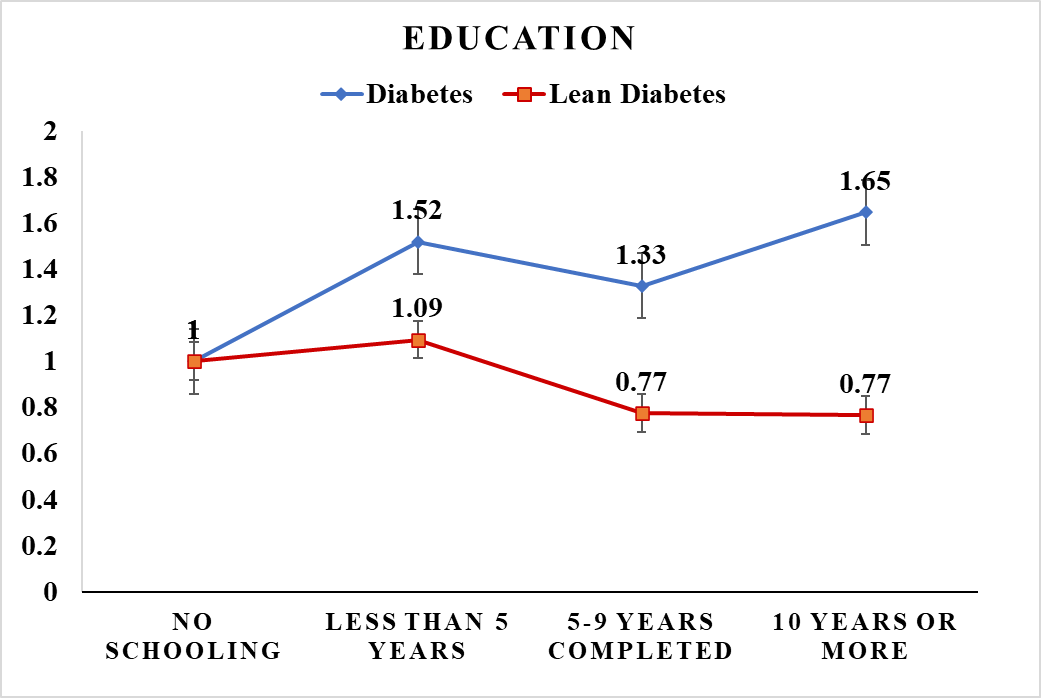
**
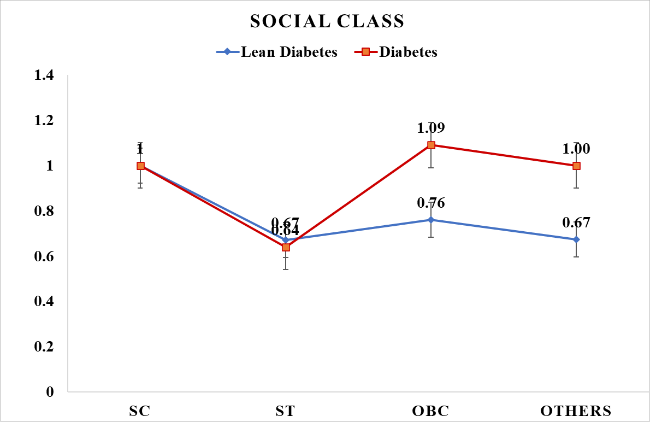
**

**Figure (b)**

**Figure (c)**

**Figures S2. Decomposition of Erreygers’ concentration index of lean diabetes among middle-aged adults and elderly in India (2017-18)**

| **Table S1: Sample Characteristics (Weighted %)** | | |
| --- | --- | --- |
| **Characteristics** | **Percentage** | **Sample size (N)** |
| **Total** | **100** | **58824** |
| **MPCE quintile** |  |  |
| Poorest | 20.0 | 10192 |
| poor | 20.0 | 10454 |
| Middle | 20.0 | 11294 |
| Richer | 20.0 | 12818 |
| Richest | 20.0 | 14066 |
| **Education** |  |  |
| No Schooling | 50.9 | 27690 |
| Less than 5 Years | 11.2 | 6833 |
| 5-9 years completed | 20.6 | 13487 |
| 10 years or more | 17.3 | 10814 |
| **Place of Residence** |  |  |
| Rural | 70.7 | 38764 |
| Urban | 29.3 | 20060 |
| **Social class/Caste** |  |  |
| SC | 19.7 | 9864 |
| ST | 8.7 | 10468 |
| OBC | 45.3 | 22363 |
| Others | 26.3 | 16129 |
| **Religion** |  |  |
| Hindu | 82.5 | 43060 |
| Muslim | 11.1 | 6833 |
| Christian | 2.9 | 5920 |
| Others | 3.5 | 3011 |
| **Marital Status** |  |  |
| Currently Married | 74.1 | 44108 |
| Widowed | 23.1 | 12807 |
| Others | 2.8 | 1909 |
| **Living Arrangement** |  |  |
| Living alone | 3.8 | 2084 |
| Living with spouse | 16.4 | 8970 |
| Living with Children | 56.7 | 34343 |
| Living with others | 23.1 | 13427 |
| **Work status** |  |  |
| currently working | 47.5 | 27353 |
| Previously worked | 26.8 | 15173 |
| Never worked | 25.7 | 16298 |
| **Health Insurance** |  |  |
| No | 79.5 | 45330 |
| Yes | 20.5 | 13494 |
| **BMI** |  |  |
| underweight | 21.6 | 10807 |
| Normal weight | 51.8 | 30838 |
| overweight | 19.8 | 12856 |
| obesity | 6.8 | 4323 |
| **Diabetes** |  |  |
| No | 88.3 | 51374 |
| Yes | 11.7 | 7450 |
| **Diabetes (Diagnosed)** |  |  |
| No | 90.4 | 52683 |
| Yes | 9.6 | 6141 |
| **Lean Diabetes** |  |  |
| No | 99.2 | 58405 |
| Yes | 0.8 | 419 |
| **Lean Diabetes (Diagnosed)** |  |  |
| No | 99.5 | 58546 |
| Yes | 0.5 | 278 |
| **Smoke** |  |  |
| No | 61.9 | 37195 |
| Yes | 38.1 | 21629 |
| **Alcohol usage** |  |  |
| No | 84.8 | 48248 |
| Yes | 16.2 | 10576 |

| **Table S2: Bivariate distribution of BMI (%) across sociodemographic characteristics among older adults in India, 2017-18** | | | | | | | | | | |
| --- | --- | --- | --- | --- | --- | --- | --- | --- | --- | --- |
| **Characteristics** | **Underweight** | **95 % CI** | **Normal Weight** | **95 % CI** | **Overweight** | **95 % CI** | **Obese** | **95 % CI** | **F stat** | **P value** |
| **Total** | **21.6** | **(20.8,22.4)** | **51.8** | **(50.6,53.0)** | **19.8** | **(18.9,20.8)** | **6.7** | **(06.1,07.5)** |  |  |
| **MPCE Quintile** |  |  |  |  |  |  |  |  |  |  |
| Poorest | 32.2 | (30.6,33.9) | 53.1 | (51.5,54.6) | 12.0 | (10.9,13.1) | 2.8 | (2.3,03.3) | 5011.654 | <0.001 |
| Poorer | 27.0 | (25.3,28.7) | 53.1 | (51.6,54.6) | 15.4 | (14.3,16.6) | 4.5 | (3.6,05.4) |  |
| Middle | 21.6 | (20.3,22.9) | 54.9 | (53.5,56.2) | 17.6 | (16.6,18.7) | 5.9 | (5.0,06.8) |  |
| Richer | 16.8 | (15.4,18.2) | 51.9 | (50.3,53.5) | 23.7 | (22.4,25.0) | 7.6 | (6.8,08.5) |  |
| Richest | 10.4 | (09.1,11.2) | 46.2 | (42.2,50.2) | 30.4 | (28.6,32.3) | 13.0 | (10.9,15.4) |  |
| **Education** |  |  |  |  |  |  |  |  |  |  |
| No schooling | 28.2 | (27.2,29.3) | 52.8 | (51.8,53.8) | 14.7 | (13.9,15.6) | 4.2 | (3.7,04.9) | 4618.614 | <0.001 |
| Less than 5 years | 22.6 | (20.9,24.4) | 53.7 | (51.7,55.6) | 17.8 | (16.2,19.4) | 6.0 | (4.9,07.2) |  |
| 5-9 years completed | 15.7 | (14.7,16.8) | 51.8 | (50.4,53.2) | 24.3 | (22.8,25.7) | 8.2 | (7.4,09.0) |  |
| 10 years or more | 8.5 | (06.9,10.1) | 47.8 | (43.6,52.) | 30.9 | (28.9,32.9) | 12.9 | (11.1,14.9) |  |
| **Diabetes** |  |  |  |  |  |  |  |  |  |  |
| No | 23.6 | (22.8,24.4) | 52.7 | (51.7,53.7) | 18.2 | (17.3,19.2) | 5.5 | (5.0,06.1) | 2989.453 | <0.001 |
| Yes | 6.8 | (05.6,08.1) | 45.3 | (42.2,48.5) | 32.0 | (30.4,33.7) | 15.9 | (12.6,19.9) |  |
| **Smoke** |  |  |  |  |  |  |  |  |  |  |
| No | 16.9 | (16.1,17.8) | 50.3 | (48.6,52.0) | 23.6 | (22.5,24.9) | 9.2 | (8.2,10.2) | 3178.879 | <0.001 |
| Yes | 29.2 | (28.1,30.0) | 54.3 | (53.3,55.3) | 13.6 | (12.9,14.4) | 2.8 | (2.4,03.3) |  |
| **Alcohol Usage** |  |  |  |  |  |  |  |  |  |  |
| No | 20.6 | (19.7,21.4) | 51.2 | (49.8,52.5) | 20.8 | (19.8,21.8) | 7.5 | (6.7,08.4) | 778.340 | <0.001 |
| Yes | 27.3 | (25.8,28.9) | 55.6 | (54.1,57.1) | 14.7 | (13.5,15.9) | 2.4 | (2.1,02.9) |  |
| **Place of Residence** |  |  |  |  |  |  |  |  |  |  |
| Rural | 26.4 | (25.5,27.3) | 54.4 | (53.7,55.1) | 15.4 | (14.8,16.0) | 3.8 | (3.5,04.2) | 6137.913 | <0.001 |
| Urban | 10.0 | (08.9,11.2) | 45.6 | (42.5,48.7) | 30.6 | (28.8,32.4) | 13.8 | (12.2,15.7) |  |
| **Caste** |  |  |  |  |  |  |  |  |  |  |
| SC | 26.4 | (24.9,28.0) | 53.6 | (52.0,55.3) | 15.5 | (14.5,16.7) | 4.4 | (3.2,5.9) | 2259.263 | <0.001 |
| ST | 35.0 | (32.9,37.3) | 52.8 | (50.8,54.7) | 9.9 | (08.3,11.8) | 2.3 | (1.7,2.9) |  |
| OBC | 20.4 | (19.3,21.6) | 51.5 | (49.3,53.7) | 21.0 | (19.3,22.8) | 7.0 | (5.9,8.3) |  |
| Others | 15.5 | (14.5,16.6) | 50.7 | (49.5,51.9) | 24.3 | (23.2,25.5) | 9.5 | (8.7,10.3) |  |
| **Religion** |  |  |  |  |  |  |  |  |  |  |
| Hindu | 22.1 | (21.1,23.1) | 52.1 | (51.0,53.2) | 19.5 | (18.4,20.6) | 6.3 | (5.7,7.0) | 286.838 | 0.025 |
| Muslim | 18.9 | (16.6,21.3) | 51.5 | (48.3,54.7) | 20.9 | (19.1,22.7) | 8.7 | (6.2,12.3) |  |
| Christians | 24.9 | (14.8,38.6) | 51.1 | (42.7,59.4) | 18.3 | (14.8,22.4) | 5.7 | (4.3,07.6) |  |
| Others | 15.7 | (12.9,18.8) | 47.5 | (44.3,50.8) | 26.1 | (23.0,29.4) | 10.7 | (9.2,12.5) |  |
| **Marital status** |  |  |  |  |  |  |  |  |  |  |
| Married | 19.2 | (18.3,20.2) | 52.9 | (51.8,53.9) | 21.1 | (19.8,22.4) | 6.8 | (6.1,07.5) | 776.866 | <0.001 |
| Widowed | 28.0 | (26.4,29.5) | 48.9 | (47.1,50.7) | 16.6 | (15.5,17.7) | 6.6 | (4.8,9.1) |  |
| Others | 31.6 | (21.3,44.4) | 48.6 | (40.1,57.1) | 13.2 | (10.5,16.5) | 6.6 | (4.7,09.2) |  |
| **Living arrangement** |  |  |  |  |  |  |  |  |  |  |
| Living alone | 28.0 | (24.7,31.5) | 50.8 | (47.1,54.5) | 16.3 | (13.3,19.8) | 4.9 | (3.8,6.4) | 761.565 | <0.001 |
| Living with spouse | 21.6 | (20.0,23.2) | 52.5 | (50.3,54.8) | 19.4 | (17.9,21.0) | 6.5 | (5.4,7.7) |  |
| Living with spouse & children | 18.6 | (17.6,19.7) | 52.9 | (51.5,54.3) | 21.6 | (19.8,23.4) | 6.9 | (6.2,7.6) |  |
| Living with children & others | 27.8 | (26.2,29.6) | 48.9 | (46.5,51.3) | 16.4 | (15.3,17.6) | 6.8 | (5.1,9.1) |  |
| **Work status** |  |  |  |  |  |  |  |  |  |  |
| Currently working | 21.0 | (19.9,22.1) | 56.0 | (54.9,57.2) | 19.0 | (17.6,20.5) | 3.9 | (3.5,4.4) | 2139.299 | <0.001 |
| previously worked | 25.9 | (24.5,27.4) | 50.6 | (49.3,52.0) | 17.3 | (16.3,18.3) | 6.2 | (5.5,6.9) |  |
| Never Worked | 18.2 | (16.8,19.2) | 45.3 | (42.5,48.1) | 24.0 | (22.9,25.1) | 12.5 | (10.5,14.8) |  |
| **Health Insurance** |  |  |  |  |  |  |  |  |  |  |
| No | 21.8 | (20.9,22.70) | 51.8 | (50.6,53.0) | 19.6 | (18.8,20.5) | 6.8 | (6.0,7.6) | 12.467 | 0.495 |
| Yes | 20.7 | (19.5,22.0) | 52.0 | (50.1,53.8) | 20.6 | (18.3,23.1) | 6.7 | (5.9,7.7) |  |

| **Table S3 Unadjusted Lean diabetes prevalence (%) across background characteristics for overall and diabetic sample** | | | | | | |
| --- | --- | --- | --- | --- | --- | --- |
| **Background characteristics** | **Lean diabetes (overall sample)** | | | **Lean diabetes (Among Diabetic sample)** | | |
| **Yes** | **95 % CI** | **F stat (P value)** | **Yes** | **96 % CI** | **F stat (P value)** |
| **Overall** | **0.8** | **(0.660,0.939)** |  | **6.8** | **(5.62, 8.11)** |  |
| **MPCE Quintile** |  |  |  |  |  |  |
| Poorest | 1.2 | (0.775,1.760) | 56.106 (0.004) | 15.4 | (10.6, 22.0) | 2231.29 (<0.001) |
| Poorer | 0.8 | (0.605,1.140) | 9.8 | (7.15, 13.2) |
| Middle | 0.9 | (0.663,1.140) | 8.8 | (6.72, 11.4) |
| Richer | 0.6 | (0.441,0.856) | 4.7 | (3.37, 6.47) |
| Richest | 0.5 | (0.319,0.638) | 2.4 | (1.64, 3.38) |
| **Education** |  |  |  |  |  |  |
| No Schooling | 0.9 | (0.699,1.120) | 27.381 (0.028) | 11.4 | (9.03, 14.3) | 1590.16 (<0.001) |
| Less than 5 years | 1.0 | (0.719,1.520) | 7.9 | (5.47, 11.3) |
| 5-9 year | 0.6 | (0.451,0.896) | 4.8 | (3.44, 6.74) |
| 10 years | 0.5 | (0.349,0.775) | 2.6 | (1.7, 3.86) |
| **Place of Residence** |  |  |  |  |  |  |
| Rural | 0.9 | (0.732,1.100) | 27.414 (0.003) | 11.1 | (9.13, 13.30) | 2084.59 (<0.001) |
| Urban | 0.5 | (0.385,0.708) | 2.6 | (1.87, 3.57) |
| **Caste** |  |  |  |  |  |  |
| SC | 1.1 | (0.757,1.550) | 21.848 (0.064) | 12.8 | (9.08, 17.80) | 988.51 (<0.001) |
| ST | 0.6 | (0.392,1.020) | 13.4 | (8.75, 20.1) |
| OBC | 0.8 | (0.600,0.954) | 5.8 | (4.50, 7.48) |
| Others | 0.7 | (0.514,0.875) | 4.8 | (3.67, 6.23) |
| **Religion** |  |  |  |  |  |  |
| Hindu | 0.8 | (0.609,0.926) | 6.101 (0.535) | 6.6 | (5.32, 8.26) | 13.21 (0.900) |
| Muslim | 1.0 | (0.676,1.340) | 7.3 | (5.11, 10.30) |
| Christian | 0.9 | (0.532,0.590) | 6.3 | (3.65, 10.60) |
| Others | 1.0 | (0.463,2.220) | 8.0 | (3.66, 16.60) |
| **Marital status** |  |  |  |  |  |  |
| Currently married | 0.7 | (0.607,0.861) | 12.848 (0.134) | 6.2 | (5.19, 7.4) | 104,58 (0.161) |
| Widowed | 1.0 | (0.714,1.400) | 8.4 | (5.82, 12.0) |
| Others | 0.7 | (0.313,0.700) | 7.7 | (3.62, 15.60) |
| **Living arrangement** |  |  |  |  |  |  |
| Living alone | 1.1 | (0.642,1.960) | 28.054 (0.018) | 9.7 | (5.29, 17.0) | 143.61 (0.158) |
| Living with spouse | 1.0 | (0.765,1.400) | 7.5 | (5.47, 10.1) |
| Living with children | 0.6 | (0.520,0.794) | 5.8 | (4.68, 7.17) |
| Living with others | 0.9 | (0.665,0.260) | 8.0 | (5.58, 11.2) |
| **Work status** |  |  |  |  |  |  |
| Currently working | 0.5 | (0.365,0.607) | 152.271 (<0.001) | 5.9 | (4.55, 7.54) | 511.12 (<0.001) |
| previously worked | 1.4 | (0.060,1.940) | 9.6 | (7.17, 12.70) |
| Never Worked | 0.7 | (0.541,0.899) | 4.7 | (3.51, 6.25) |
| **Health insurance** |  |  |  |  |  |  |
| No | 0.8 | (0.642,0.978) | 0.086 (0.859) | 6.9 | (5.56, 8.62) | 12.77 (0.473) |
| Yes | 0.8 | (0.592,0.998) | 6.1 | (4.73, 7.93) |
| **Smoke** |  |  |  |  |  |  |
| No | 0.6 | (0.509,0.737) | 46.836 (<0.001) | 4.5 | (3.64, 5.49) | 1620.38 (<0.001) |
| Yes | 1.1 | (0.825,1.390) | 12.8 | (10.10, 16.20) |
| **Alcohol usage** |  |  |  |  |  |  |
| No | 0.8 | (0.638,0.951) | 0.354 (0.741) | 6.5 | (5.23, 7.93) | 81.87 (0.090) |
| Yes | 0.8 | (0.591,0.170) | 9.0 | (6.49, 12.40) |

| **Table S4. Multivariate Logistic regression estimates of diabetes and lean diabetes in India** | | | | |
| --- | --- | --- | --- | --- |
| **Characteristics** | **Diabetes** | | **Lean diabetes** | |
| **OR (95% CI)** | **p-value** | **OR (95% CI)** | **p-value** |
| **BMI category** |  |  |  |  |
| Underweight | ref |  | - | - |
| Normal weight | 2.55 (2.10, 3.09) | 0.000 | - | - |
| Overweight | 4.29 (3.55, 5.18) | 0.000 | - | - |
| Obesity | 5.98 (4.29, 8.34) | 0.000 | - | - |
| **Age Group** |  |  |  |  |
| 45-54 | ref |  | ref |  |
| 55-64 | 1.84 (1.62, 2.09) | 0.000 | 2.19 (1.45, 3.30) | 0.000 |
| 65-74 | 2.17 (1.83, 2.58) | 0.000 | 1.95 (1.24, 3.07) | 0.004 |
| 75+ | 1.71 (1.46, 2.00) | 0.000 | 2.56 (1.58, 4.15) | 0.000 |
| **Sex** |  |  |  |  |
| Male | ref |  | ref |  |
| Female | 0.70 (0.61, 0.80) | 0.000 | 0.42 (0.27, 0.64) | 0.000 |
| **MPCE Quintile** |  |  |  |  |
| Poorest | ref |  | ref |  |
| Poorer | 0.95 (0.79, 1.16) | 0.637 | 0.76 (1.13, 3.09) | 0.269 |
| Middle | 0.99 (0.82, 1.19) | 0.888 | 0.83 (0.56, 1.25) | 0.376 |
| Richer | 1.16 (0.97, 1.37) | 0.100 | 0.64 (0.39, 1.04) | 0.073 |
| Richest | 1.37 (1.12, 1.66) | 0.002 | 0.53 (0.32, 0.88) | 0.014 |
| **Education** |  |  |  |  |
| No Schooling | ref |  | ref |  |
| Less Than 5 Years | 1.52 (1.29, 1.79) | 0.000 | 1.10 (0.75, 1.62) | 0.615 |
| 5-9 Years Completed | 1.33 (1.12, 1.57) | 0.001 | 0.79 (0.53, 1.19) | 0.259 |
| 10 Years or More | 1.65 (1.39, 1.94) | 0.000 | 0.79 (0.51, 1.21) | 0.275 |
| **Living Arrangement** |  |  |  |  |
| Living alone | ref |  | ref |  |
| Living with spouse | 1.49 (0.95, 2.34) | 0.085 | 3.31 (0.46, 23.78) | 0.235 |
| Living with spouse & children | 1.40 (0.87, 2.24) | 0.160 | 2.40 (0.34, 16.77) | 0.378 |
| Living with children & others | 1.01 (0.72, 1.41) | 0.955 | 0.77 (0.45, 1.33) | 0.350 |
| **Marital Status** |  |  |  |  |
| Married | ref |  | ref |  |
| Widowed | 1.38 (0.91, 2.08) | 0.130 | 3.75 (0.53, 26.38) | 0.184 |
| Others | 1.11 (0.65, 1.89) | 0.708 | 3.61 (0.44, 29.57) | 0.232 |
| **Religion** |  |  |  |  |
| Hindu | ref |  | ref |  |
| Muslim | 1.14 (0.96, 1.34) | 0.142 | 1.37 (0.92, 2.03) | 0.122 |
| Christian | 1.29 (1.04, 1.61) | 0.021 | 1.32 (0.67, 2.59) | 0.419 |
| Others | 1.02 (0.84, 1.24) | 0.862 | 1.43 (0.64, 3.20) | 0.385 |
| **Caste** |  |  |  |  |
| SC | ref |  | ref |  |
| ST | 0.64 (0.49, 0.83) | 0.001 | 0.66 (0.35, 1.23) | 0.190 |
| OBC | 1.09 (0.95, 1.24) | 0.225 | 0.75 (0.53, 1.06) | 0.107 |
| Others | 1.00 (0.87, 1.16) | 0.989 | 0.68 (0.46, 1.01) | 0.059 |
| **Place Of Residence** |  |  |  |  |
| Rural | ref |  | ref |  |
| Urban | 1.52 (1.35, 1.73) | 0.000 | 0.74 (0.51, 1.07) | 0.111 |
| **Region** |  |  |  |  |
| North | ref |  | ref |  |
| Central | 1.03 (0.87, 1.22) | 0.716 | 1.47 (0.79, 2.73) | 0.220 |
| East | 1.18 (1.00, 1.40) | 0.050 | 1.19 (0.74, 1.93) | 0.472 |
| North-East | 1.00 (0.80, 1.26) | 0.984 | 0.96 (0.42, 2.19) | 0.929 |
| West | 1.18 (0.99, 1.42) | 0.071 | 0.83 (0.47, 1.45) | 0.508 |
| South | 1.73 (1.50, 1.99) | 0.000 | 1.42 (0.88, 2.29) | 0.151 |
| **Work Status** |  |  |  |  |
| Currently Working | ref |  | ref |  |
| Previously Worked | 1.73 (1.53, 1.94) | 0.000 | 2.55 (1.66, 3.92) | 0.000 |
| Never Worked | 1.85 (1.60, 2.14) | 0.000 | 2.52 (1.58, 4.01) | 0.000 |
| **Health Insurance** |  |  |  |  |
| No | ref |  | ref |  |
| Yes | 1.10 (0.94, 1.28) | 0.242 | 1.04 (0.75, 1.46) | 0.801 |
| **Smoking** |  |  |  |  |
| No | ref |  | ref |  |
| Yes | 0.79 (0.69, 0.90) | 0.000 | 1.35 (0.98, 1.86) | 0.066 |
| **Alcohol Use** |  |  |  |  |
| No | ref |  | ref |  |
| Yes | 0.97 (0.84, 1.12) | 0.658 | 0.75 (0.48, 1.16) | 0.194 |

| **Table S5. Erreyger’s Concentration Index for Lean diabetes prevalence by Sociodemographic characteristics** | | | | | |
| --- | --- | --- | --- | --- | --- |
|
| **Characteristics** | **Sample size** | **Index value** | **Std. error** | **p-value** | **95% CI** |
| MPCE quintile | 38178 | -0.004 | 0.001 | 0.007 | (-0.006, -0.001) |
| Education | 31134 | -0.005 | 0.002 | 0.001 | (-0.008, -0.002) |
| cast | 38492 | -0.006 | 0.002 | 0.001 | (-0.009, -0.002) |
| sex | 31473 | -0.005 | 0.002 | 0.008 | (-0.009, -0.001) |
| region | 32684 | -0.004 | 0.002 | 0.007 | (-0.007, -0.001) |
| Residence | 20060 | -0.005 | 0.002 | 0.005 | (-0.009, -0.002) |
| Work status | 27353 | -0.001 | 0.001 | 0.418 | (-0.004, 0.002) |
| Religion | 15764 | -0.005 | 0.003 | 0.036 | (-0.010, 0.000) |
| Marital status | 14716 | -0.007 | 0.004 | 0.075 | (-0.015, 0.001) |
| Health insurance | 13494 | -0.005 | 0.003 | 0.055 | (-0.010, 0.000) |
| north region | 10715 | -0.011 | 0.003 | 0.001 | (-0.017, -0.005) |
| central region | 7904 | -0.007 | 0.007 | 0.350 | (-0.021, 0.007) |
| east region | 10029 | -0.001 | 0.002 | 0.560 | (-0.006, 0.003) |
| northeast region | 6642 | -0.001 | 0.003 | 0.818 | (-0.006, 0.005) |
| west region | 7626 | -0.001 | 0.002 | 0.612 | (-0.005, 0.003) |
| South | 15908 | -0.005 | 0.003 | 0.054 | (-0.011, 0.000) |
